# Supplementary material for: Hepatitis B Virus DNA Integration, Chronic Infections and Hepatocellular Carcinoma
Source: MDPI journal article supplement (doi:10.3390/microorganisms9081787), 2021-08-23
Supplement: s1 [file s1]

## Supplementary Material

# Hepatitis B Virus DNA integration, chronic infections and Hepatocellular Carcinoma

Maria Bousali <sup>1</sup>, George Papatheodoridis <sup>2</sup>, Dimitrios Paraskevis <sup>3</sup> and Timokratis Karamitros <sup>1,4,\*</sup>

<sup>1</sup> Bioinformatics and Applied Genomics Unit, Department of Microbiology, Hellenic Pasteur Institute, 11521 Athens, Greece; mbousali@gmail.com (M.B.)

<sup>2</sup> Department of Gastroenterology, Medical School of National and Kapodistrian University of Athens, "Laiko" General Hospital of Athens, 11527 Athens, Greece; gepapath@med.uoa.gr

<sup>3</sup> Department of Hygiene Epidemiology and Medical Statistics, School of Medicine, National and Kapodistrian University of Athens, 15772 Athens, Greece; dparask@med.uoa.gr

<sup>4</sup> Laboratory of Medical Microbiology, Department of Microbiology, Hellenic Pasteur Institute, 11521 Athens, Greece

\*Correspondence: tkaram@pasteur.gr, +30-210-6478871 (T.K.)

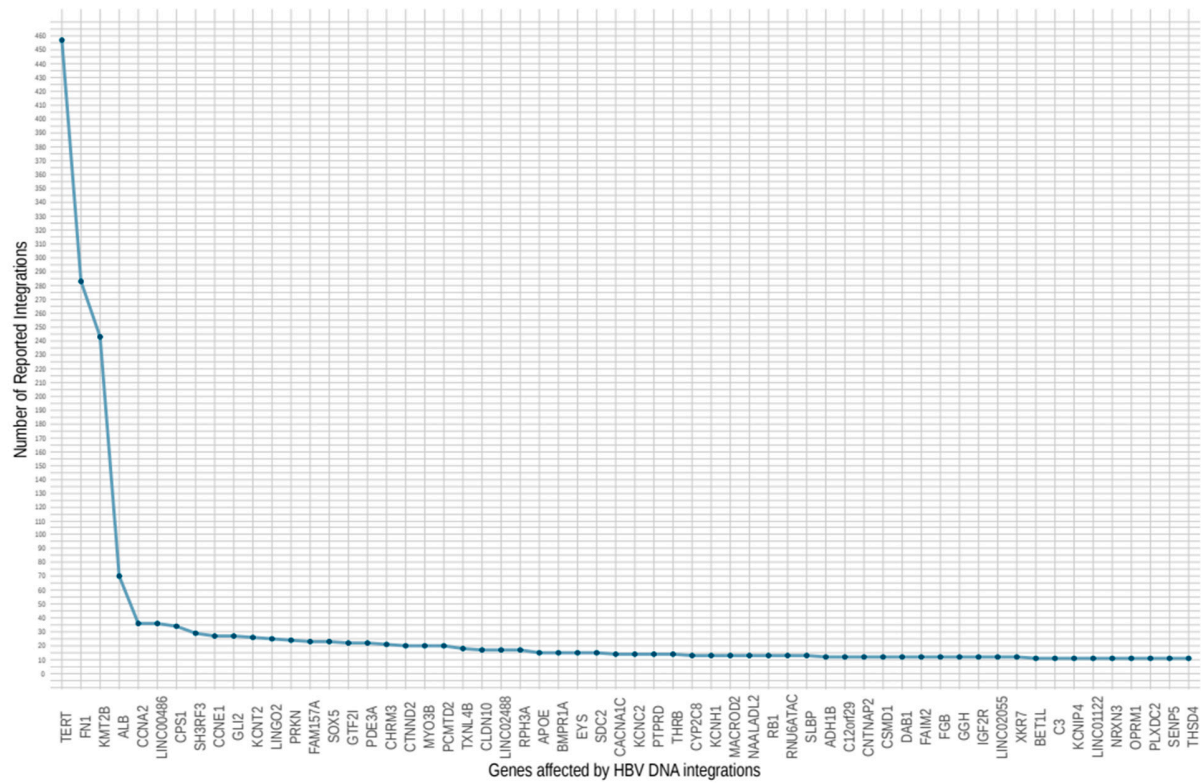

**Supplementary Figure S1:** Cumulative number of HBV DNA integrations in the human genes (filtered to >10 reported integrations in the literature).
